# Supplementary material for: Optimal drug regimens for primary biliary cirrhosis: a systematic review and network meta-analysis
Source: PubMed Central journal article supplement (PMC4695204; doi:10.18632/oncotarget.4528), 2015-06-19
Supplement: oncotarget-06-24533-s001.pdf [file oncotarget-06-24533-s001.pdf]

# Optimal drug regimens for primary biliary cirrhosis: a systematic review and network meta-analysis

## Supplementary Material

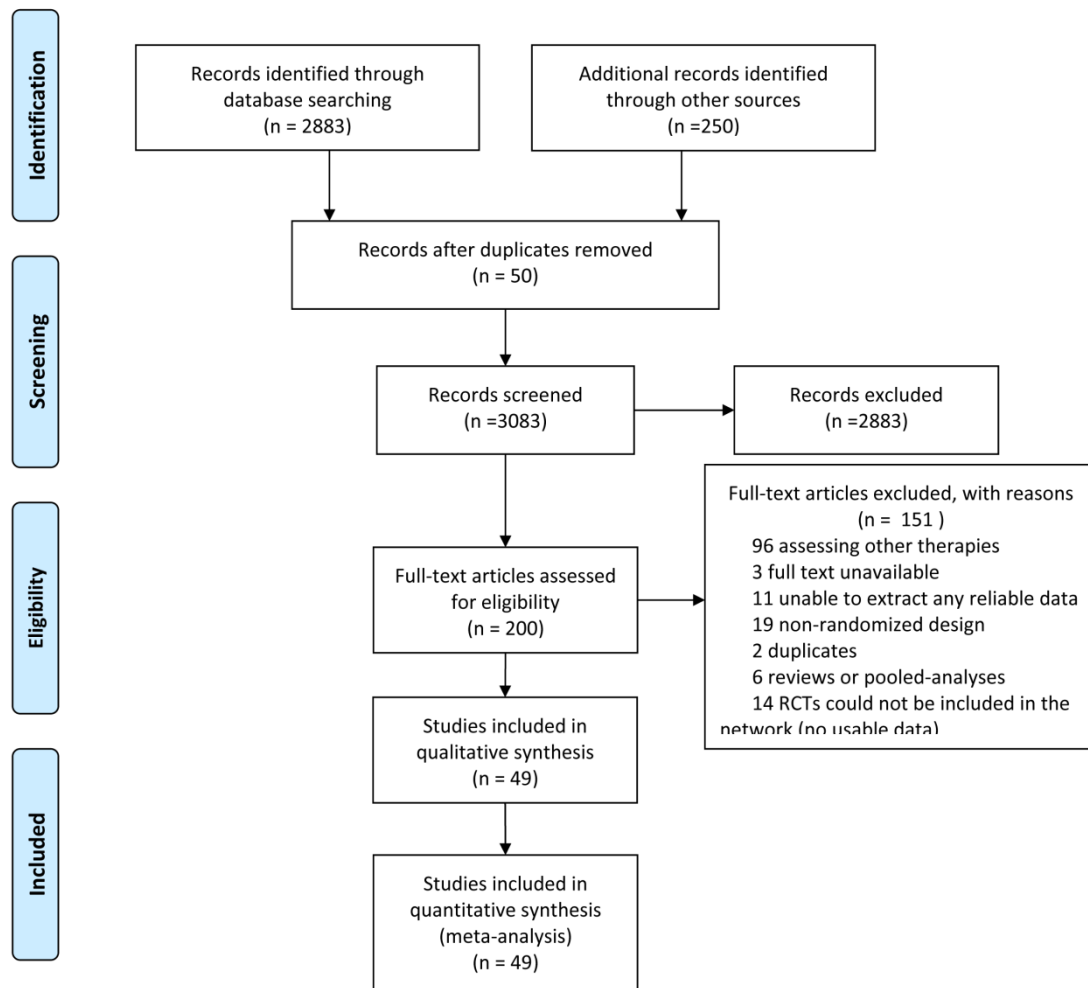

Supplementary 1. PRISMA Flow Diagram

|                      | Random sequence generation (selection bias) | Allocation concealment (selection bias) | Blinding of participants and personnel (performance bias) | Blinding of outcome assessment (detection bias) | Incomplete outcome data (attrition bias) | Selective reporting (reporting bias) | Other bias |
|----------------------|---------------------------------------------|-----------------------------------------|-----------------------------------------------------------|-------------------------------------------------|------------------------------------------|--------------------------------------|------------|
| Almasio 2000         | +                                           | ?                                       | +                                                         | +                                               | +                                        | +                                    | +          |
| Battezzati 1993      | +                                           | +                                       | +                                                         | +                                               | +                                        | +                                    | ?          |
| Battezzati 2001      | +                                           | +                                       | +                                                         | +                                               | +                                        | +                                    | ?          |
| Bodenheimer 1988     | +                                           | ?                                       | +                                                         | +                                               | +                                        | +                                    | ?          |
| Chazouilleres 1998   | +                                           | ?                                       | ?                                                         | ?                                               | +                                        | +                                    | ?          |
| Chazouilleres 2006   | +                                           | +                                       | ?                                                         | ?                                               | +                                        | +                                    | +          |
| Christensen 1985     | +                                           | +                                       | +                                                         | +                                               | +                                        | ?                                    | ?          |
| Combes 1995          | ?                                           | ?                                       | +                                                         | +                                               | +                                        | +                                    | +          |
| Combes 2005          | ?                                           | ?                                       | ?                                                         | ?                                               | +                                        | +                                    | +          |
| Dickson 1985         | +                                           | +                                       | +                                                         | +                                               | +                                        | +                                    | +          |
| Epstein 1981         | ?                                           | ?                                       | +                                                         | +                                               | ?                                        | +                                    | ?          |
| Eriksson 1997        | +                                           | ?                                       | +                                                         | +                                               | +                                        | +                                    | +          |
| Gonzalez-Koch 1997   | ?                                           | ?                                       | ?                                                         | ?                                               | +                                        | +                                    | +          |
| Günsar 2002          | ?                                           | ?                                       | ?                                                         | ?                                               | +                                        | +                                    | +          |
| Heathcote 1976       | ?                                           | +                                       | +                                                         | +                                               | +                                        | +                                    | +          |
| Heathcote 1994       | +                                           | +                                       | +                                                         | +                                               | +                                        | +                                    | +          |
| Hendrickse 1999      | +                                           | +                                       | +                                                         | +                                               | ?                                        | +                                    | ?          |
| Henry 1988           | +                                           | ?                                       | +                                                         | +                                               | +                                        | +                                    | +          |
| Heurgue 2007         | +                                           | +                                       | ?                                                         | ?                                               | +                                        | +                                    | +          |
| Hwang 1993           | ?                                           | ?                                       | +                                                         | +                                               | +                                        | +                                    | +          |
| Ikeda 1996           | +                                           | ?                                       | +                                                         | +                                               | +                                        | +                                    | +          |
| Itakura 2004         | ?                                           | ?                                       | ?                                                         | ?                                               | +                                        | +                                    | +          |
| Iwasaki 2008         | +                                           | +                                       | +                                                         | +                                               | +                                        | +                                    | +          |
| Kanda 2003           | ?                                           | ?                                       | ?                                                         | ?                                               | +                                        | +                                    | +          |
| Kaplan 1986          | ?                                           | ?                                       | ?                                                         | ?                                               | +                                        | +                                    | +          |
| Kaplan 2003          | +                                           | +                                       | +                                                         | +                                               | +                                        | +                                    | +          |
| Leung 2011           | +                                           | +                                       | +                                                         | ?                                               | +                                        | +                                    | ?          |
| Leuschner 1989       | ?                                           | ?                                       | +                                                         | +                                               | +                                        | +                                    | +          |
| Leuschner 1999       | +                                           | +                                       | +                                                         | +                                               | +                                        | +                                    | ?          |
| Lindor 1994          | +                                           | +                                       | +                                                         | +                                               | +                                        | +                                    | +          |
| Lindor 1995          | +                                           | ?                                       | ?                                                         | ?                                               | ?                                        | +                                    | +          |
| Lombard 1993         | +                                           | +                                       | +                                                         | ?                                               | ?                                        | +                                    | ?          |
| Matioff 1982         | ?                                           | +                                       | +                                                         | +                                               | +                                        | +                                    | ?          |
| Minuk 1988           | +                                           | ?                                       | ?                                                         | ?                                               | +                                        | +                                    | +          |
| Mitchison 1992       | +                                           | +                                       | +                                                         | ?                                               | +                                        | +                                    | ?          |
| Neuberger 1985       | ?                                           | ?                                       | +                                                         | +                                               | +                                        | +                                    | +          |
| Oka 1990             | ?                                           | +                                       | +                                                         | +                                               | +                                        | +                                    | +          |
| Ozaslan 2010         | ?                                           | ?                                       | ?                                                         | ?                                               | +                                        | +                                    | +          |
| Papatheodoridis 2002 | +                                           | +                                       | ?                                                         | ?                                               | +                                        | +                                    | ?          |
| Pares 2000           | +                                           | +                                       | +                                                         | +                                               | +                                        | +                                    | ?          |
| Poupan 1996          | +                                           | ?                                       | ?                                                         | ?                                               | +                                        | +                                    | +          |
| Poupon 1991          | ?                                           | ?                                       | +                                                         | +                                               | +                                        | +                                    | +          |
| Taal 1983            | ?                                           | ?                                       | +                                                         | +                                               | +                                        | ?                                    | +          |
| Tanaka 2011          | +                                           | ?                                       | +                                                         | +                                               | +                                        | +                                    | +          |
| Turner 1994          | ?                                           | ?                                       | +                                                         | +                                               | +                                        | +                                    | ?          |
| Vuoristo 1995        | ?                                           | ?                                       | ?                                                         | ?                                               | +                                        | +                                    | ?          |
| Warnes 1987          | +                                           | +                                       | +                                                         | ?                                               | +                                        | ?                                    | +          |
| Wiesner 1990         | ?                                           | ?                                       | +                                                         | ?                                               | ?                                        | +                                    | +          |
| Zifroni 1991         | +                                           | ?                                       | +                                                         | ?                                               | +                                        | +                                    | +          |

### Supplementary 2. Summary for risk of bias of included randomized controlled trials.

The green symbols represent low risk of bias, the yellow symbols represent unclear risk of bias, and the red symbols represent high risk of bias. The figure was generated using Review Manager Version 5.

#### A. Mortality or liver transplantation

|                    |                     |                    |                     |                    |                     |                    |                     |                    |                    |                    |                    |
|--------------------|---------------------|--------------------|---------------------|--------------------|---------------------|--------------------|---------------------|--------------------|--------------------|--------------------|--------------------|
| ADP                | 1.11 (0.02, 2.21)   | 1.05 (0.28, 1.81)  | 1.06 (0.05, 26.89)  | 0.78 (0.08, 7.40)  | 3.92 (0.45, 22.79)  | 1.63 (0.20, 4.31)  | 2.83 (0.81, 10.16)  | 1.77 (0.40, 7.52)  | 1.08 (0.16, 6.74)  | 1.86 (0.65, 5.43)  | 1.44 (0.44, 4.64)  |
| 0.95 (0.02, 53.33) | REF #ADP#UDCA       | 0.95 (0.02, 53.18) | 0.98 (0.02, 115.05) | 0.71 (0.01, 99.12) | 3.35 (0.02, 210.56) | 0.88 (0.02, 51.17) | 2.61 (0.05, 145.58) | 1.61 (0.39, 96.89) | 0.98 (0.02, 59.74) | 1.89 (0.64, 66.78) | 1.31 (0.03, 62.15) |
| 0.95 (0.26, 1.63)  | 0.95 (0.02, 47.11)  | 0.95 (0.02, 47.11) | 0.99 (0.05, 22.50)  | 0.74 (0.08, 6.43)  | 3.71 (0.72, 19.56)  | 0.98 (0.24, 3.43)  | 2.69 (0.95, 7.74)   | 1.67 (0.56, 4.31)  | 1.01 (0.18, 5.77)  | 1.77 (0.80, 3.89)  | 1.38 (0.51, 3.37)  |
| 0.94 (0.04, 22.09) | 1.02 (0.01, 106.25) | 1.01 (0.04, 20.35) | 0.95 (0.02, 25.72)  | 0.74 (0.02, 25.72) | 3.83 (0.11, 94.10)  | 0.95 (0.04, 21.85) | 2.68 (0.15, 57.28)  | 1.66 (0.57, 17.28) | 1.05 (0.08, 11.11) | 1.79 (0.98, 11.14) | 1.38 (0.07, 23.88) |
| 1.29 (0.14, 11.28) | 1.42 (0.02, 79.95)  | 1.38 (0.16, 15.64) | 1.15 (0.04, 55.61)  | 0.97 (0.02, 25.72) | 5.03 (0.41, 65.76)  | 1.28 (0.12, 12.78) | 1.85 (0.42, 31.13)  | 2.22 (0.24, 24.08) | 1.34 (0.11, 18.54) | 2.17 (0.32, 19.79) | 1.81 (0.21, 16.07) |
| 0.25 (0.04, 1.53)  | 0.28 (0.00, 12.92)  | 0.27 (0.05, 1.39)  | 0.26 (0.01, 7.69)   | 0.20 (0.02, 2.43)  | 0.97 (0.04, 1.48)   | 0.36 (0.04, 1.48)  | 0.73 (0.15, 1.59)   | 0.45 (0.07, 2.77)  | 0.37 (0.04, 1.93)  | 0.48 (0.11, 2.08)  | 0.37 (0.04, 1.39)  |
| 0.87 (0.21, 3.09)  | 1.03 (0.02, 16.82)  | 1.03 (0.09, 4.34)  | 1.05 (0.05, 27.69)  | 0.78 (0.08, 8.16)  | 1.83 (0.48, 25.43)  | 0.95 (0.04, 25.43) | 2.71 (0.48, 14.63)  | 1.72 (0.41, 8.74)  | 1.03 (0.17, 8.19)  | 1.89 (0.67, 6.11)  | 1.45 (0.45, 5.23)  |
| 0.35 (0.10, 1.26)  | 0.38 (0.01, 18.22)  | 0.37 (0.11, 1.05)  | 0.38 (0.02, 7.73)   | 0.28 (0.03, 2.37)  | 1.38 (0.28, 6.76)   | 0.37 (0.09, 1.17)  | 0.91 (0.11, 2.44)   | 0.62 (0.17, 2.11)  | 0.38 (0.07, 2.09)  | 0.66 (0.13, 1.29)  | 0.51 (0.21, 1.18)  |
| 0.56 (0.11, 2.48)  | 0.62 (0.01, 30.29)  | 0.60 (0.21, 1.51)  | 0.60 (0.03, 14.27)  | 0.45 (0.04, 4.12)  | 2.22 (0.36, 13.50)  | 0.58 (0.11, 2.44)  | 1.49 (0.47, 5.88)   | 1.69 (0.46, 14.09) | 0.41 (0.09, 1.89)  | 1.09 (0.17, 5.07)  | 0.82 (0.25, 2.59)  |
| 0.82 (0.11, 6.19)  | 1.02 (0.02, 13.07)  | 0.99 (0.17, 5.37)  | 0.95 (0.08, 11.13)  | 0.75 (0.05, 9.38)  | 3.72 (0.52, 26.96)  | 0.97 (0.12, 5.89)  | 2.69 (0.48, 14.09)  | 1.64 (0.28, 10.62) | 0.95 (0.13, 2.79)  | 1.75 (0.37, 8.05)  | 1.39 (0.32, 5.87)  |
| 0.34 (0.18, 1.55)  | 0.39 (0.01, 18.12)  | 0.37 (0.12, 1.44)  | 0.36 (0.03, 13.42)  | 0.42 (0.02, 3.13)  | 2.89 (0.48, 8.19)   | 0.56 (0.16, 1.49)  | 1.52 (0.77, 3.07)   | 0.95 (0.13, 2.79)  | 0.57 (0.12, 2.71)  | 0.85 (0.17, 4.13)  | 0.77 (0.43, 1.29)  |
| 0.69 (0.22, 2.27)  | 0.76 (0.02, 31.15)  | 0.72 (0.30, 1.88)  | 0.73 (0.04, 14.08)  | 0.55 (0.06, 4.36)  | 2.68 (0.37, 10.88)  | 0.71 (0.19, 2.18)  | 1.95 (0.85, 4.86)   | 1.27 (0.39, 4.05)  | 0.74 (0.18, 3.16)  | 1.29 (0.77, 2.21)  | UDCA               |

#### B. Adverse events

|                    |                    |                     |                     |                    |                     |                     |                    |                    |                    |                   |
|--------------------|--------------------|---------------------|---------------------|--------------------|---------------------|---------------------|--------------------|--------------------|--------------------|-------------------|
| ADP                | 1.40 (0.48, 22.39) | 1.22 (0.04, 57.65)  | 1.84 (0.28, 49.58)  | 0.64 (0.04, 8.80)  | 2.10 (0.34, 17.44)  | 5.03 (0.85, 30.25)  | 3.19 (0.34, 26.03) | 0.52 (0.04, 5.18)  | 0.61 (0.12, 2.57)  | 0.47 (0.08, 2.19) |
| 0.29 (0.04, 2.10)  | 0.95 (0.02, 16.05) | 1.12 (0.10, 13.11)  | 0.18 (0.01, 2.47)   | 0.62 (0.11, 4.02)  | 1.46 (0.33, 7.28)   | 0.92 (0.19, 4.49)   | 0.92 (0.19, 4.49)  | 0.33 (0.02, 1.28)  | 0.38 (0.05, 0.54)  | 0.14 (0.03, 0.48) |
| 0.82 (0.02, 26.66) | 2.00 (0.05, 78.41) | 0.95 (0.02, 16.05)  | 1.09 (0.05, 165.51) | 0.31 (0.01, 21.41) | 1.77 (0.05, 56.47)  | 4.21 (0.35, 112.51) | 2.66 (0.05, 64.63) | 0.41 (0.01, 11.18) | 0.51 (0.01, 11.26) | 0.19 (0.01, 1.64) |
| 0.26 (0.02, 3.54)  | 0.89 (0.08, 10.11) | 0.32 (0.01, 19.44)  | 0.97 (0.02, 1.83)   | 0.56 (0.05, 7.66)  | 1.30 (0.14, 14.78)  | 0.83 (0.06, 11.54)  | 0.83 (0.06, 11.54) | 0.13 (0.01, 2.05)  | 0.16 (0.02, 1.28)  | 0.12 (0.01, 0.77) |
| 1.56 (0.10, 26.18) | 5.46 (0.41, 73.36) | 1.88 (0.04, 121.45) | 0.14 (0.26, 117.63) | 1.38 (0.27, 57.07) | 7.83 (0.87, 101.43) | 5.03 (0.11, 78.11)  | 0.81 (0.05, 11.66) | 0.81 (0.05, 11.66) | 0.06 (0.00, 0.46)  | 0.73 (0.08, 6.55) |
| 0.48 (0.06, 2.93)  | 1.41 (0.25, 7.93)  | 0.57 (0.02, 21.28)  | 1.79 (0.11, 19.18)  | 0.30 (0.02, 3.75)  | 0.30 (0.02, 3.75)   | 2.40 (0.45, 9.89)   | 1.52 (0.17, 6.45)  | 0.25 (0.02, 1.84)  | 0.29 (0.06, 0.81)  | 0.22 (0.04, 0.72) |
| 0.20 (0.01, 1.18)  | 0.68 (0.14, 3.99)  | 0.28 (0.01, 6.39)   | 0.77 (0.07, 7.88)   | 0.11 (0.02, 1.48)  | 0.41 (0.10, 2.19)   | 0.96 (0.08, 12.76)  | 0.64 (0.08, 5.76)  | 0.10 (0.01, 0.71)  | 0.12 (0.04, 0.29)  | 0.09 (0.02, 0.26) |
| 0.31 (0.04, 2.95)  | 1.09 (0.22, 5.28)  | 0.38 (0.01, 19.72)  | 1.21 (0.09, 17.23)  | 0.20 (0.01, 3.28)  | 0.66 (0.11, 3.41)   | 1.37 (0.27, 10.78)  | 0.56 (0.11, 2.47)  | 0.16 (0.01, 1.72)  | 0.19 (0.04, 0.90)  | 0.15 (0.03, 0.78) |
| 1.93 (0.18, 21.51) | 6.98 (0.79, 60.92) | 2.33 (0.08, 134.31) | 7.51 (0.46, 137.99) | 1.23 (0.07, 22.11) | 4.03 (0.54, 32.91)  | 8.66 (1.38, 93.88)  | 4.13 (0.58, 28.54) | REF #ADP#UDCA      | 1.17 (0.23, 7.68)  | 0.91 (0.14, 6.13) |
| 1.64 (0.39, 8.00)  | 5.60 (1.85, 18.12) | 1.96 (0.09, 76.05)  | 6.28 (0.78, 51.75)  | 1.04 (0.11, 10.80) | 1.41 (1.21, 15.71)  | 8.17 (1.41, 24.84)  | 5.28 (1.11, 24.76) | 0.89 (0.13, 5.07)  | 0.85 (0.13, 5.07)  | 0.76 (0.19, 1.39) |
| 2.13 (0.46, 12.28) | 7.14 (1.09, 50.94) | 2.56 (0.11, 96.12)  | 8.27 (0.91, 82.51)  | 1.17 (0.11, 13.29) | 4.48 (1.39, 24.79)  | 10.62 (3.90, 41.30) | 6.87 (1.32, 37.47) | 1.10 (0.19, 6.27)  | 1.11 (0.72, 2.54)  | UDCA              |

### Supplementary 3. Clinical efficacy and safety of all treatments according to network

meta-analysis in the sensitivity analysis

| Section/Topic                      | #  | Checklist Item                                                                                                                                                                                                                                                                                              | Reported on Page # |
|------------------------------------|----|-------------------------------------------------------------------------------------------------------------------------------------------------------------------------------------------------------------------------------------------------------------------------------------------------------------|--------------------|
| <b>TITLE</b>                       |    |                                                                                                                                                                                                                                                                                                             |                    |
| Title                              | 1  | Identify the report as a systematic review, meta-analysis, or both.                                                                                                                                                                                                                                         | 1                  |
| <b>ABSTRACT</b>                    |    |                                                                                                                                                                                                                                                                                                             |                    |
| Structured summary                 | 2  | Provide a structured summary including, as applicable: background; objectives; data sources; study eligibility criteria, participants, and interventions; study appraisal and synthesis methods; results; limitations; conclusions and implications of key findings; systematic review registration number. | 1                  |
| <b>INTRODUCTION</b>                |    |                                                                                                                                                                                                                                                                                                             |                    |
| Rationale                          | 3  | Describe the rationale for the review in the context of what is already known.                                                                                                                                                                                                                              | 1-2                |
| Objectives                         | 4  | Provide an explicit statement of questions being addressed with reference to participants, interventions, comparisons, outcomes, and study design (PICOS).                                                                                                                                                  | 2                  |
| <b>METHODS</b>                     |    |                                                                                                                                                                                                                                                                                                             |                    |
| Protocol and registration          | 5  | Indicate if a review protocol exists, if and where it can be accessed (e.g., Web address), and, if available, provide registration information including registration number.                                                                                                                               |                    |
| Eligibility criteria               | 6  | Specify study characteristics (e.g., PICOS, length of follow-up) and report characteristics (e.g., years considered, language, publication status) used as criteria for eligibility, giving rationale.                                                                                                      | 11-13              |
| Information sources                | 7  | Describe all information sources (e.g., databases with dates of coverage, contact with study authors to identify additional studies) in the search and date last searched.                                                                                                                                  | 11                 |
|                                    | 8  | Present full electronic search strategy for at least one database, including any limits used, such that it could be repeated.                                                                                                                                                                               | 11                 |
|                                    | 9  | State the process for selecting studies (i.e., screening, eligibility, included in systematic review, and, if applicable, included in the meta-analysis).                                                                                                                                                   | 11                 |
| Data collection process            | 10 | Describe method of data extraction from reports (e.g., piloted forms, independently, in duplicate) and any processes for obtaining and confirming data from investigators.                                                                                                                                  | 12                 |
| Data items                         | 11 | List and define all variables for which data were sought (e.g., PICOS, funding sources) and any assumptions and simplifications made.                                                                                                                                                                       | 12                 |
| Risk of bias in individual studies | 12 | Describe methods used for assessing risk of bias of individual studies (including specification of whether this was done at the study or outcome level), and how this information is to be used in any data synthesis.                                                                                      | 12                 |
| Summary measures                   | 13 | State the principal summary measures (e.g., risk ratio, difference in means).                                                                                                                                                                                                                               | 12-13              |
| Synthesis of results               | 14 | Describe the methods of handling data and combining results of studies, if done, including measures of consistency (e.g., $I^2$ ) for each meta-analysis.                                                                                                                                                   | 12-13              |

| Section/Topic                 | #  | Checklist Item                                                                                                                                                                                           | Reported on Page # |
|-------------------------------|----|----------------------------------------------------------------------------------------------------------------------------------------------------------------------------------------------------------|--------------------|
| Risk of bias across studies   | 15 | Specify any assessment of risk of bias that may affect the cumulative evidence (e.g., publication bias, selective reporting within studies).                                                             | 12-13              |
| Additional analyses           | 16 | Describe methods of additional analyses (e.g., sensitivity or subgroup analyses, meta-regression), if done, indicating which were pre-specified.                                                         | 12-13              |
| <b>RESULTS</b>                |    |                                                                                                                                                                                                          |                    |
| Study selection               | 17 | Give numbers of studies screened, assessed for eligibility, and included in the review, with reasons for exclusions at each stage, ideally with a flow diagram.                                          | 2                  |
| Study characteristics         | 18 | For each study, present characteristics for which data were extracted (e.g., study size, PICOS, follow-up period) and provide the citations.                                                             | 3                  |
| Risk of bias within studies   | 19 | Present data on risk of bias of each study and, if available, any outcome level assessment (see item 12).                                                                                                |                    |
| Results of individual studies | 20 | For all outcomes considered (benefits or harms), present, for each study: (a) simple summary data for each intervention group (b) effect estimates and confidence intervals, ideally with a forest plot. |                    |
| Synthesis of results          | 21 | Present the main results of the review. If meta-analyses done, include for each, confidence intervals and measures of consistency.                                                                       |                    |
| Risk of bias across studies   | 22 | Present results of any assessment of risk of bias across studies (see Item 15).                                                                                                                          |                    |
| Additional analysis           | 23 | Give results of additional analyses, if done (e.g., sensitivity or subgroup analyses, meta-regression [see Item 16]).                                                                                    |                    |
| <b>DISCUSSION</b>             |    |                                                                                                                                                                                                          |                    |
| Summary of evidence           | 24 | Summarize the main findings including the strength of evidence for each main outcome; consider their relevance to key groups (e.g., healthcare providers, users, and policy makers).                     | 9-11               |
| Limitations                   | 25 | Discuss limitations at study and outcome level (e.g., risk of bias), and at review-level (e.g., incomplete retrieval of identified research, reporting bias).                                            |                    |
| Conclusions                   | 26 | Provide a general interpretation of the results in the context of other evidence, and implications for future research.                                                                                  | 11                 |
| <b>FUNDING</b>                |    |                                                                                                                                                                                                          |                    |
| Funding                       | 27 | Describe sources of funding for the systematic review and other support (e.g., supply of data); role of funders for the systematic review.                                                               | 13                 |

## Supplementary 4. PRISMA Checklist
